# Supplementary material for: New lanthanide(iii) coordination polymers: synthesis, structural features, and catalytic activity in CO2 fixation
Source: Royal Society of Chemistry journal article supplement (doi:10.1039/c7dt03574h), 2017-01-01
Supplement: c7dt03574h1.pdf [file c7dt03574h1.pdf]

## *Supplementary Information of*

# **New Lanthanide(III) Coordination Polymers: Synthesis, Structural Features, and Catalytic Activity in CO<sub>2</sub> Fixation**

Cong Xu<sup>a</sup>, Yan Liu<sup>a</sup>, Li Wang<sup>a</sup>, Jingxin Ma<sup>b</sup>, Lizi Yang<sup>a</sup>, Fu-xin Pan<sup>a</sup>, Alexander M. Kirillov<sup>c</sup> and Weisheng Liu<sup>a,\*</sup>

- a. Key Laboratory of Nonferrous Metals Chemistry and Resources Utilization of Gansu Province and State Key Laboratory of Applied Organic Chemistry, College of Chemistry and Chemical Engineering, Lanzhou University, Lanzhou 730000, P. R. China
- b. College of Chemistry and Chemical Engineering, Ningxia University, Yinchuan 750021, P.R. China
- c. Centro de Química Estrutural, Instituto Superior Técnico, Universidade de Lisboa, Av. Rovisco Pais, 1049-001, Lisbon, Portugal.

## **Content**

1. Weak interactions in the structure of compound **1**. **Figure S1**.
2. Thermogravimetric (TGA) analysis of **1-6**. **Figure S2**.
3. Solid-state emission spectra of of **1, 2, 5, and 6**. **Figure S3**.
4. PXRD plots of **1-6**. **Figure S4**.
5. FT-IR spectra of **1-6**. **Figure S5**.
6. FT-IR spectra of **6** and recycled sample after catalytic experiments. **Figure S6**.
7. Epoxide substrate scope in CO<sub>2</sub> fixation reactions catalysed by **6**. **Table S1**.
8. The speculation of 2 possible catalytic mechanisms. **Figure S7**.
9. Comparison of cycloaddition reaction of CO<sub>2</sub> with epoxides catalyzed by different catalysts. **Table S2**.
10. The ORTEP-style image of **1**. **Figure S8**.
11. <sup>1</sup>H NMR spectra of the substrates and products.
12. Crystal data for compounds **1-6**. **Table S3**.
13. Selected bond length and bond angle data of compounds **1-6**. **Table S4**.
14. Supplementary references.

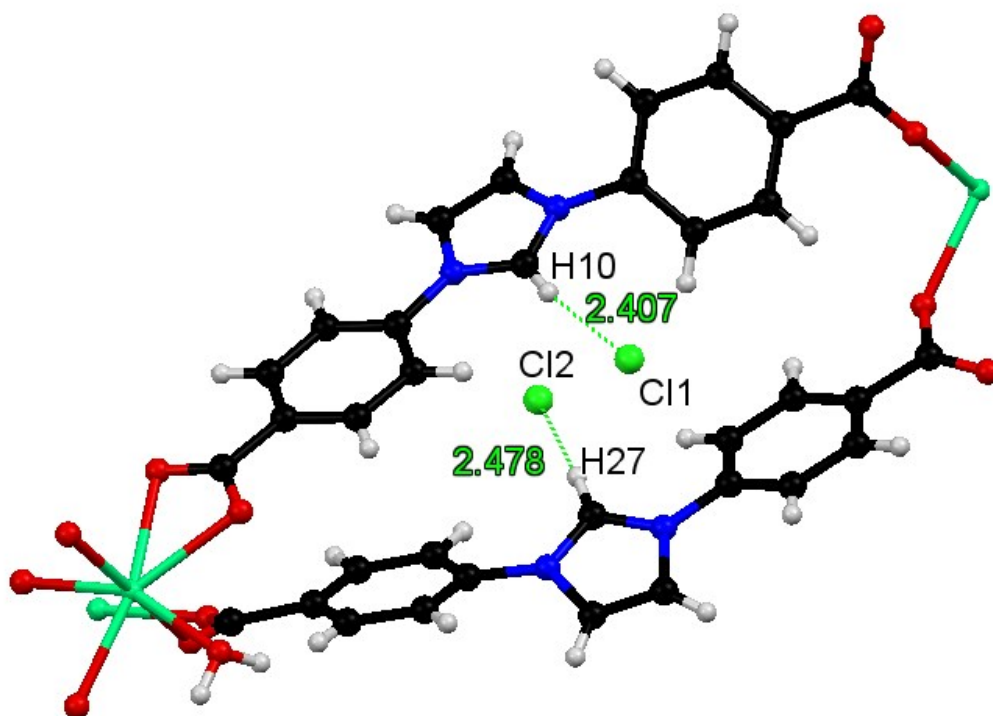

Figure S1. Weak interactions in compound 1.

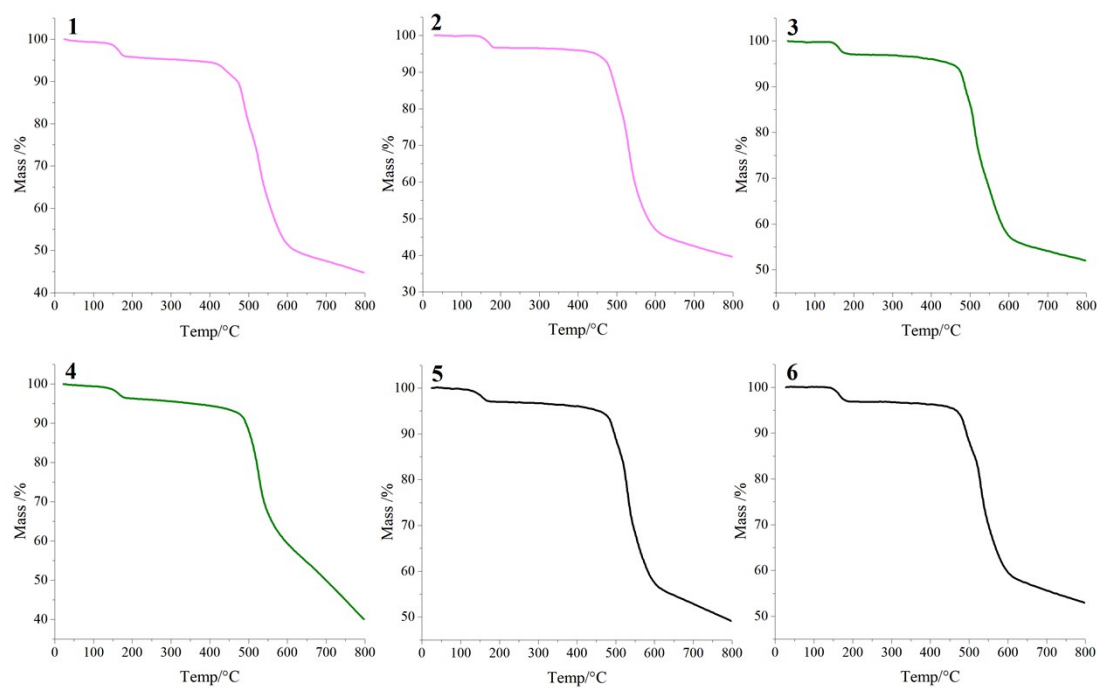

Figure S2. Thermogravimetric (TGA) analysis of 1-6.

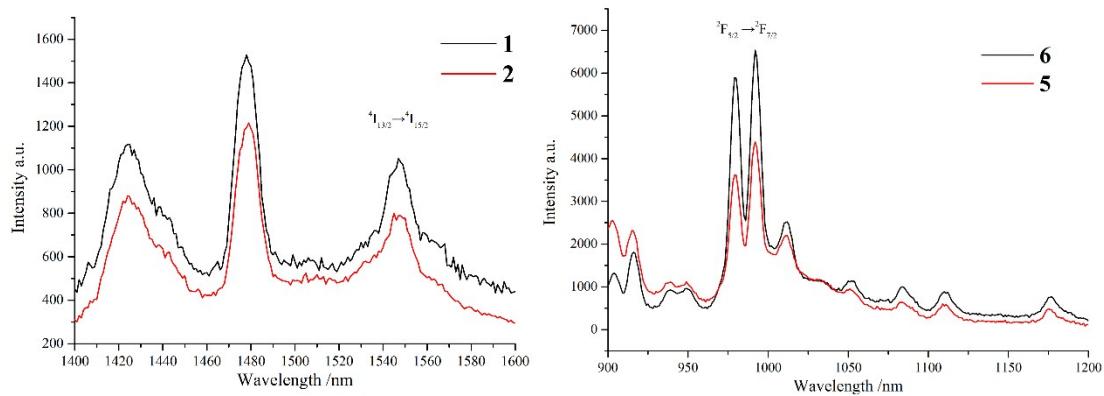

**Figure S3.** Solid-state emission spectra of **1/2** (under the excitation at 310 nm) and **5/6** (under the excitation at 332 nm).

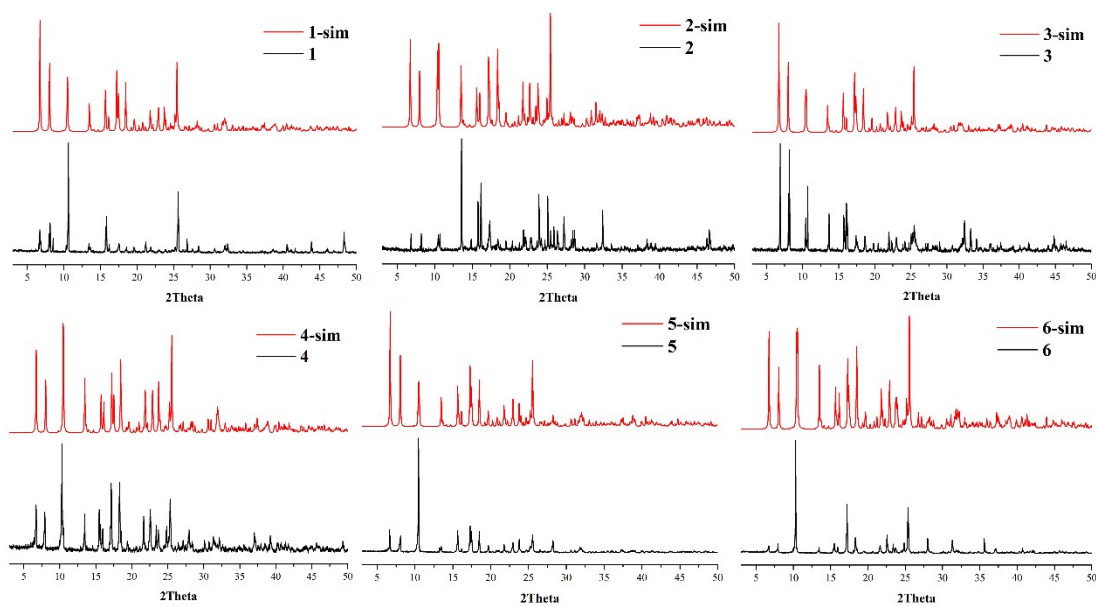

**Figure S4.** PXRD plots of compounds **1-6**. Experimental (black lines), calculated (red lines).

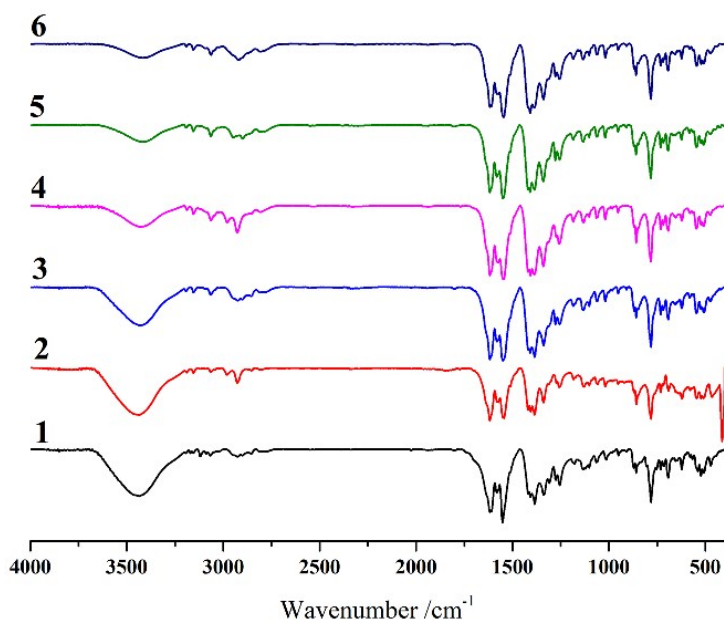

**Figure S5.** FT-IR spectra of compounds **1-6**.

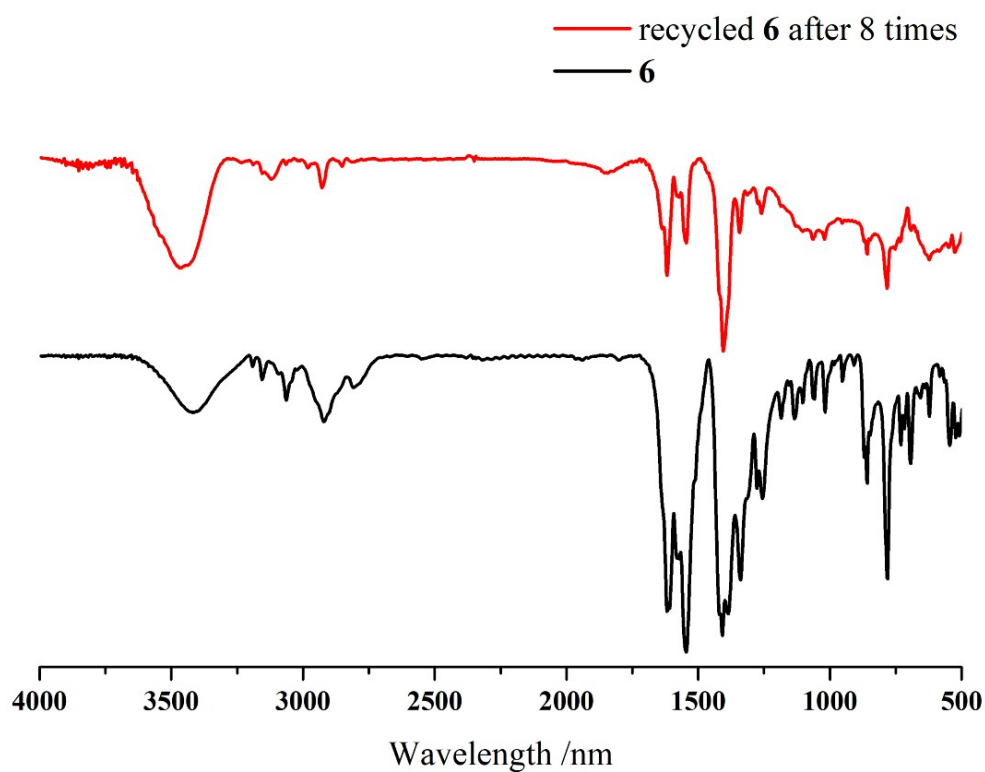

Figure S6. FT-IR spectra of **6** and recycled **6** after 8 times.

Table S1. Epoxide substrate scope in CO<sub>2</sub> fixation reactions catalysed by **6**.

| Entry | Catalyst | Substrate                                                                           | Product                                                                             | Catalyst (mol%) | TBAB (mol%) | Yield (%) | TON  | TOF (h <sup>-1</sup> ) |
|-------|----------|-------------------------------------------------------------------------------------|-------------------------------------------------------------------------------------|-----------------|-------------|-----------|------|------------------------|
| 1     | <b>6</b> | 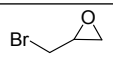 |  | 0.025           | 3.00        | 92        | 3680 | 307                    |
| 2     | <b>6</b> |  |  | 0.025           | 3.00        | 74        | 2960 | 247                    |
| 3     | <b>6</b> |  |  | 0.025           | 3.00        | 42        | 1680 | 140                    |
| 4     | <b>6</b> |  |  | 0.025           | 3.00        | 58        | 2320 | 193                    |
| 5     | <b>6</b> |  |  | 0.025           | 3.00        | 47        | 1880 | 157                    |
| 6     | <b>6</b> |  |  | 0.025           | 3.00        | 13        | 520  | 43                     |
| 7     | <b>6</b> |  |  | 0.025           | 3.00        | 40        | 1600 | 133                    |
| 8     | <b>6</b> |  |  | 0.025           | 3.00        | 34        | 1360 | 113                    |
| 9     | <b>6</b> |  |  | 0.025           | 3.00        | 41        | 1640 | 137                    |

General conditions: 10 mmol epoxide, 70 °C, 12 h. TON and TOF was calculated by the formula:

$$TON = \frac{Yield.}{n_{cat}}, \quad TOF = \frac{Yield.}{n_{cat} \times Reaction\ Time}$$

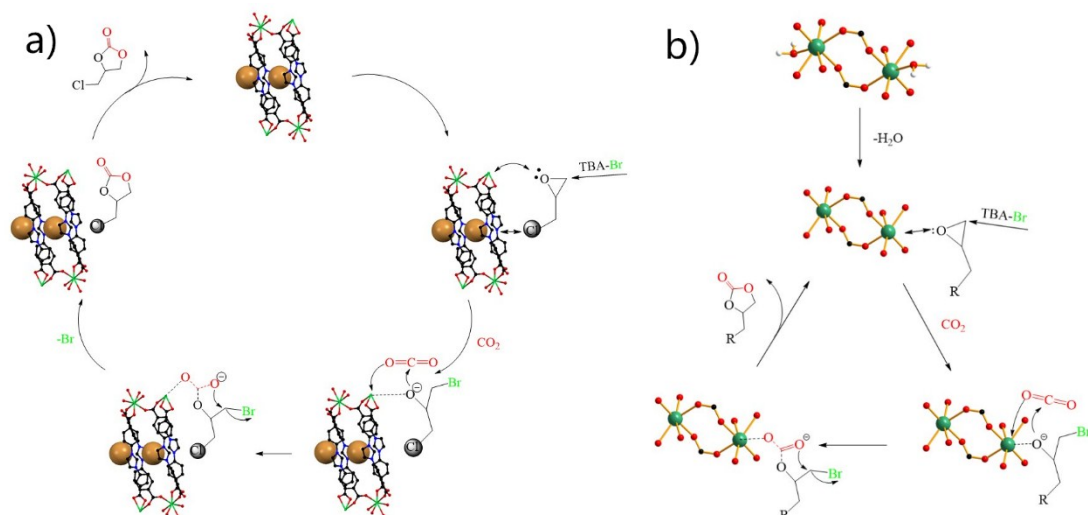

**Figure S7.** Two possible catalytic mechanisms. a) Hypothesized catalytic mechanism. b) Traditional catalytic mechanism.

**Table S2.** Comparison of cycloaddition reaction of CO<sub>2</sub> with epoxides catalyzed by different catalysts.

| Entry | Substrate                                                                           | Cat.                   | <i>T</i> (°C) | <i>P</i> <sub>CO<sub>2</sub></sub> (bar) | Co-catalyst ([Bu <sub>4</sub> N]Br %) | Time (h) | Conv. <sup>b</sup> (%) | TOF(h <sup>-1</sup> ) <sup>c</sup> | Ref.      |
|-------|-------------------------------------------------------------------------------------|------------------------|---------------|------------------------------------------|---------------------------------------|----------|------------------------|------------------------------------|-----------|
| 1     | 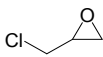 | <b>6</b>               | 70            | 1                                        | 3.00                                  | 12       | 98                     | 326.7                              | This work |
| 2     |  | Yb-complex             | 90            | 1                                        | 0.75                                  | 12       | 83                     | 69                                 | <b>1</b>  |
| 3     |  | Ni-TCPE                | 100           | 10                                       | 1.5                                   | 12       | 99                     | 167                                | <b>2</b>  |
| 4     |  | Eu-MOF                 | 70            | 1                                        | 2.5                                   | 12       | 99                     | 2.36                               | <b>3</b>  |
| 5     |  | gea-MOF-1              | 120           | 20                                       | 0.15                                  | 6        | 89                     | 99                                 | <b>4</b>  |
| 6     |  | Tb <sub>4</sub> -MOF   | 60            | 1                                        | 2.50                                  | 12       | 99                     | 4.125                              | <b>5</b>  |
| 7     |  | <b>2</b> ·THF          | 90            | 1                                        | /                                     | 12       | 97                     | 40.4                               | <b>6</b>  |
| 8     |  | Complex <b>5</b>       | 85            | 1                                        | 0.6                                   | 24       | 96                     | 40                                 | <b>7</b>  |
| 9     |  | UiO-67-NH <sub>2</sub> | 100           | 1                                        | 10                                    | 5        | 99                     | 20                                 | <b>8</b>  |
| 10    |  | MMPF-18                | r.t.          | 1                                        | 7.2                                   | 48       | 97                     | 2.03                               | <b>9</b>  |
| 11    |  | BIT-C                  | 60            | 1                                        | 5                                     | 6        | 99                     | 16.5                               | <b>10</b> |

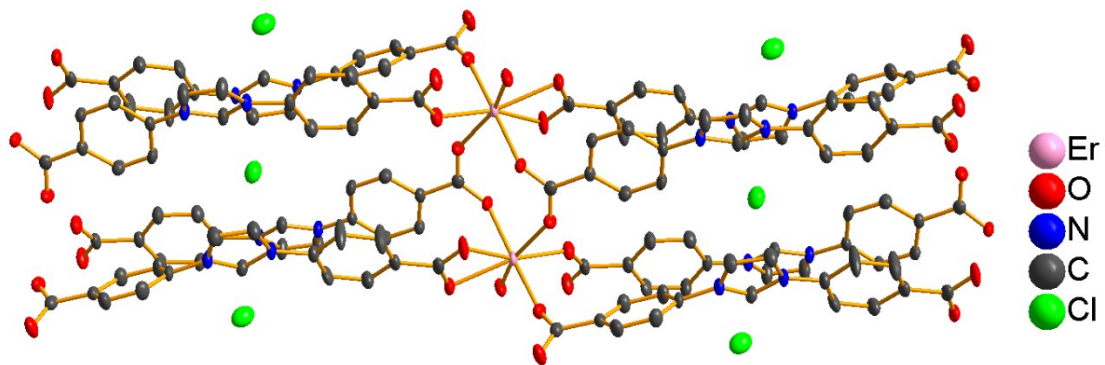

Figure S8. The ORTEP-style image of **1**.

11.  $^1\text{H}$  NMR spectra of the substrates and products.

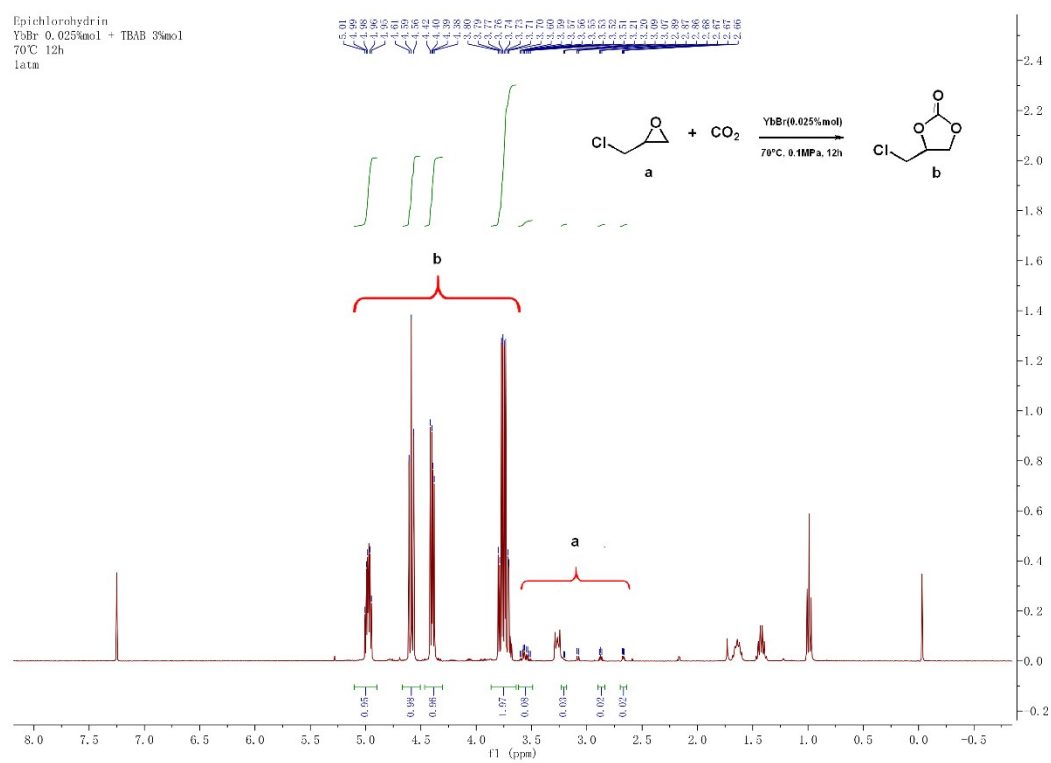

Epibromohydrin  
 YbBr 0.025mol + TBAB 3mol  
 70°C 12h  
 latm

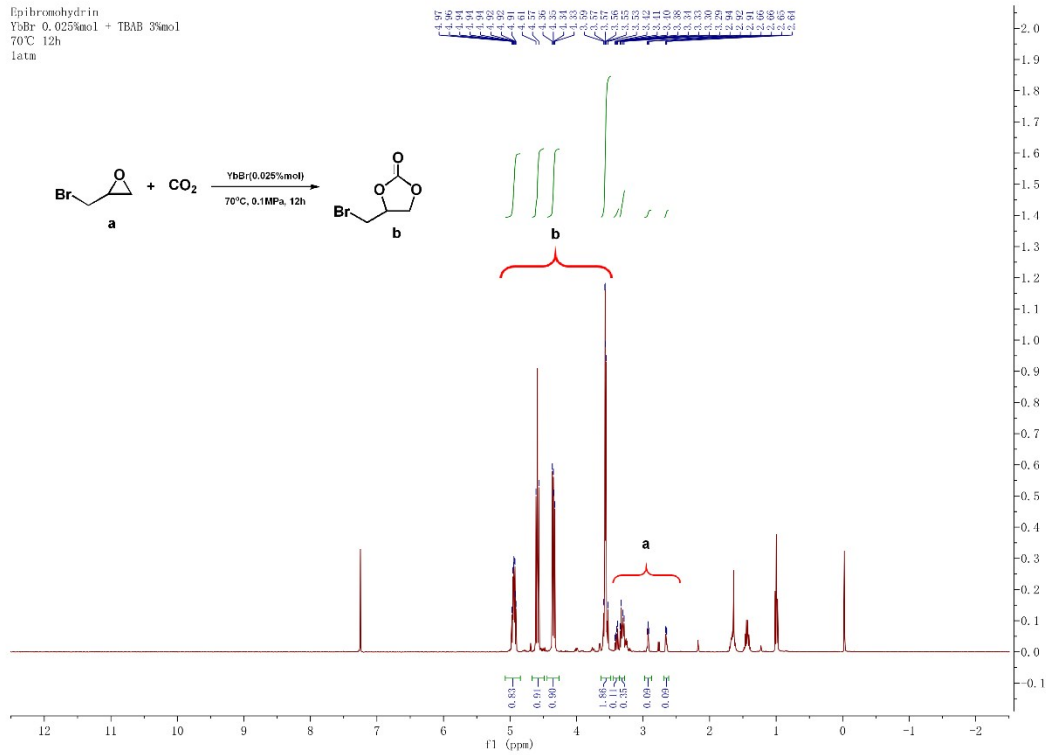

1,2-epoxybutane  
 YbBr 0.025mol + TBAB 3mol  
 70°C 12h  
 latm

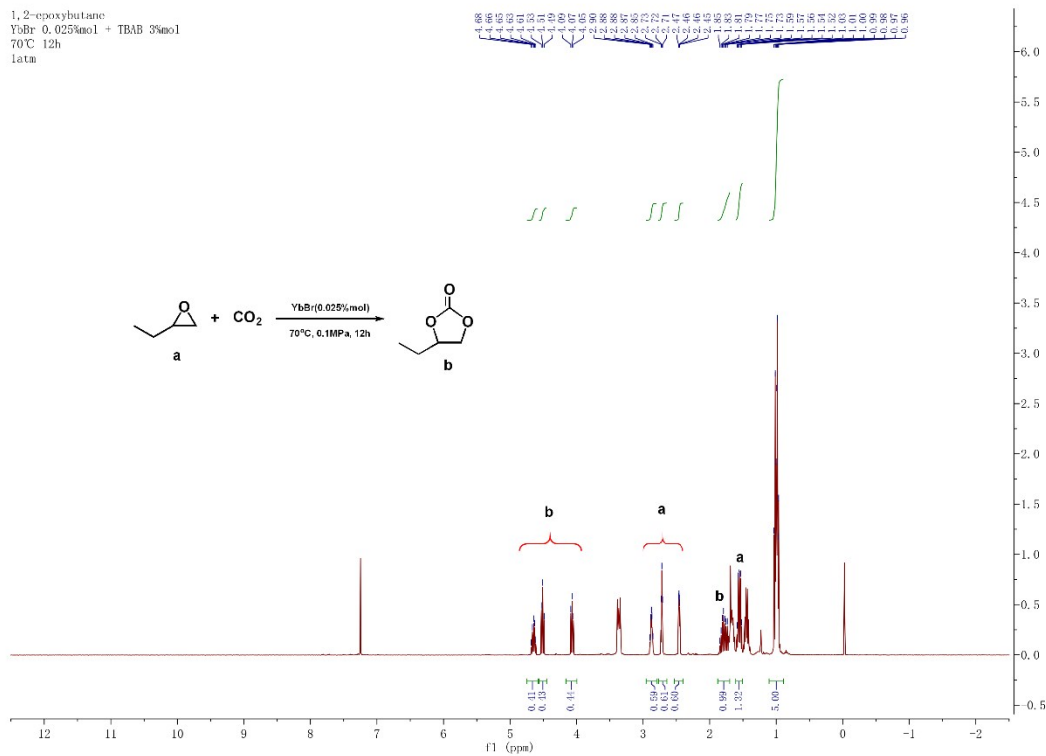

Glycidyl Phenyl Ether  
 YbBr 0.025mmol + TBAB 3mmol  
 70°C 12h  
 latin

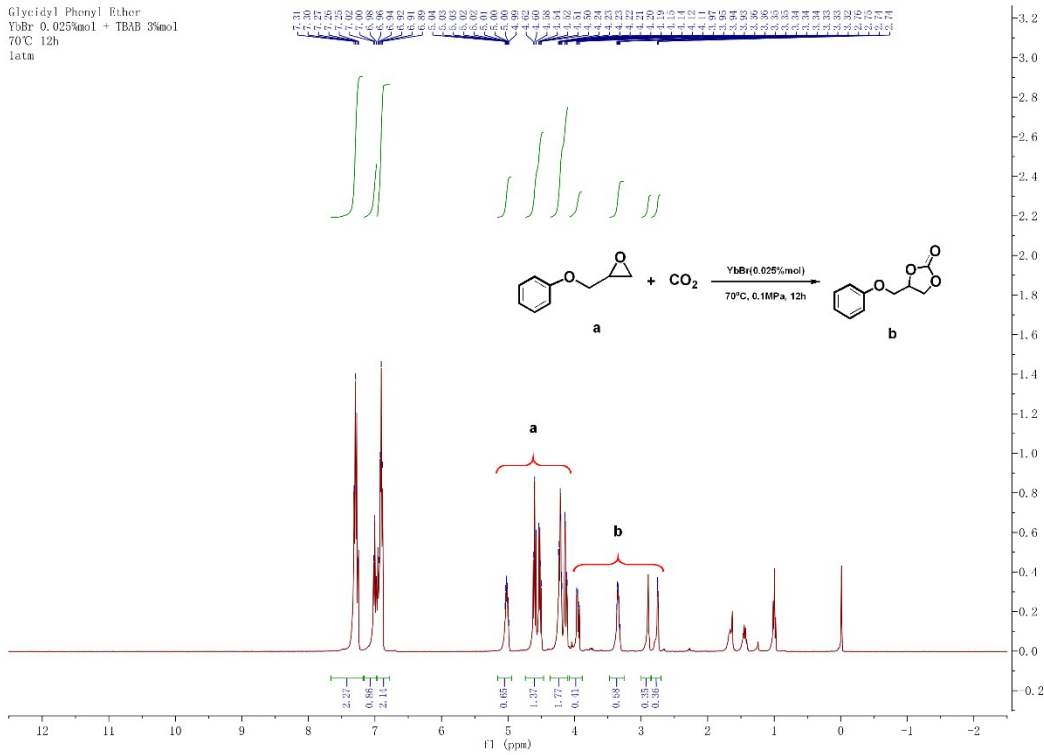

Styrene oxide  
 YbBr 0.025mmol + TBAB 3mmol  
 70°C 12h  
 latin

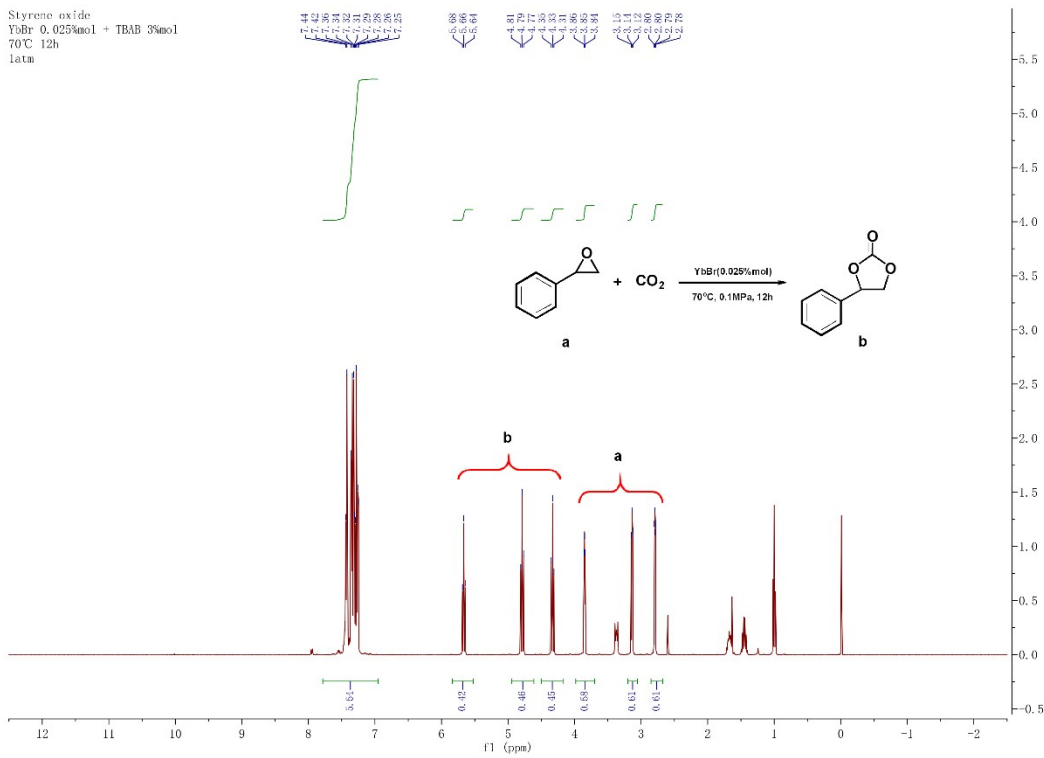



Allyl glycidyl ether  
YbBr 0.025mol + TBAB 3mol  
70°C 12h  
latm

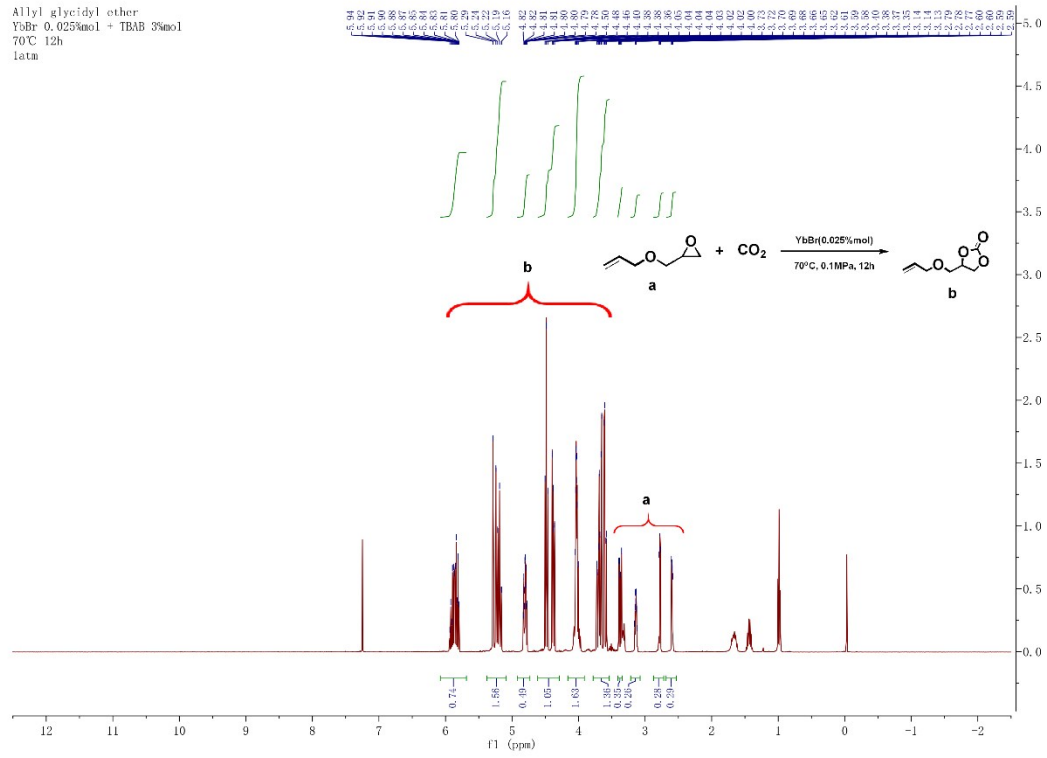

Propylene oxide  
YbBr 0.025mol + TBAB 3mol  
70°C 12h  
latm

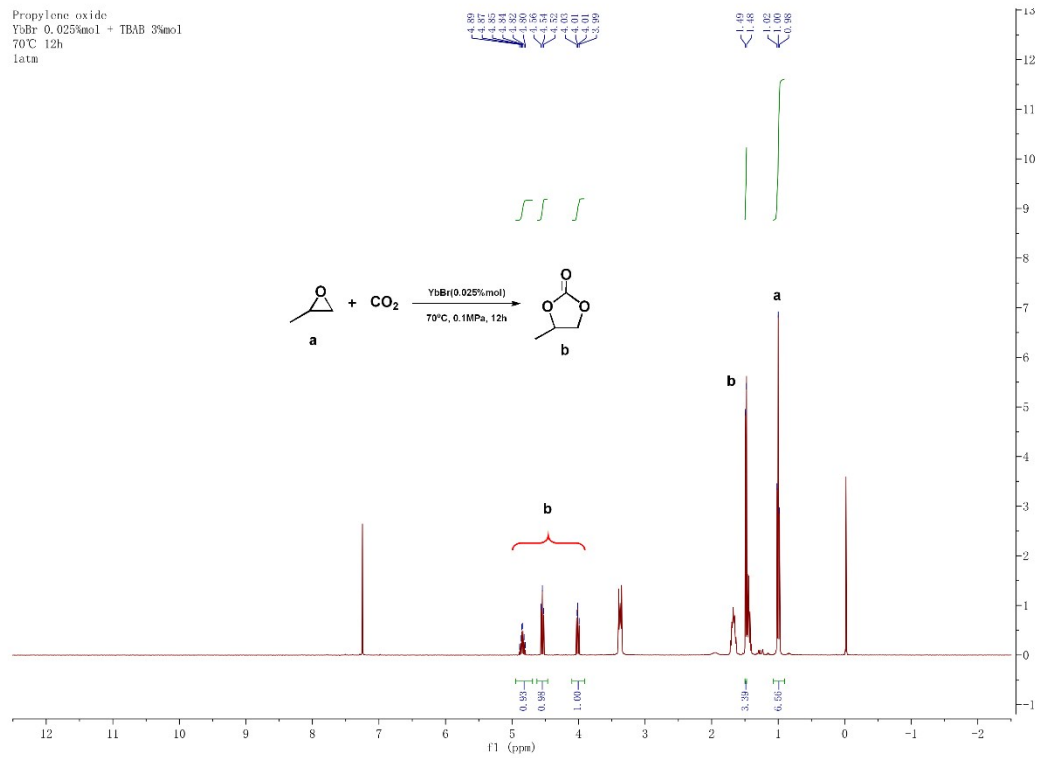

1,2-Epoxy-2-methylpropane  
 YbBr 0.025mol + TBAB 3mol  
 70°C 12h  
 latm

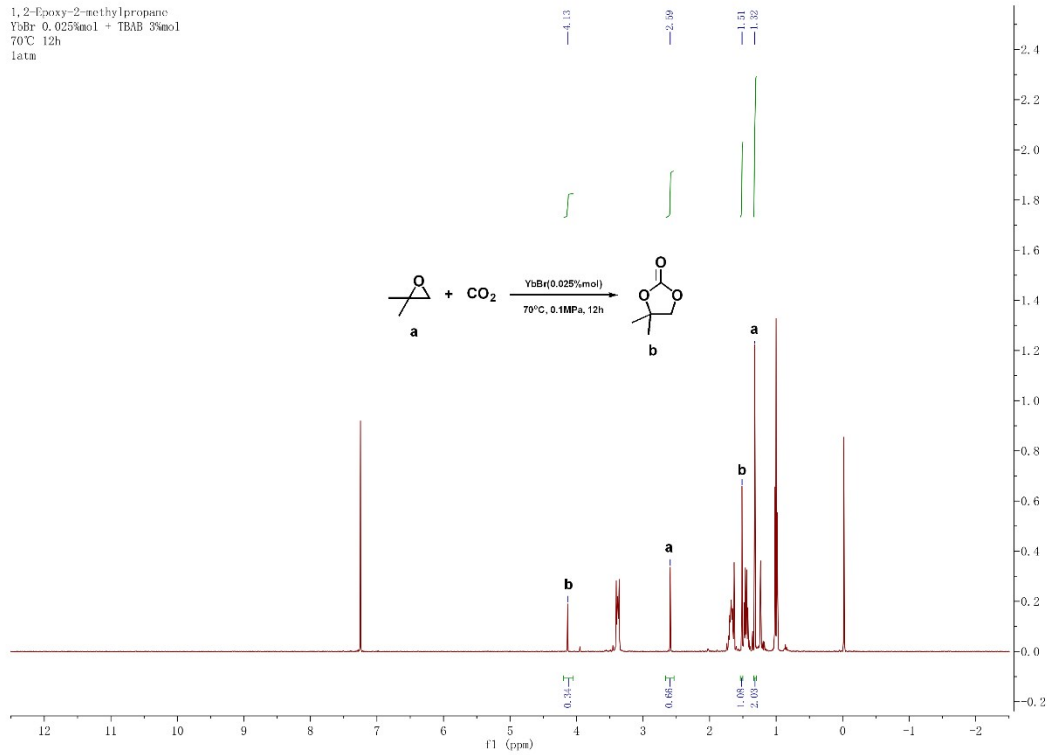

Cyclohexene oxide  
 YbBr 0.025mol + TBAB 3mol  
 70°C 12h  
 latm

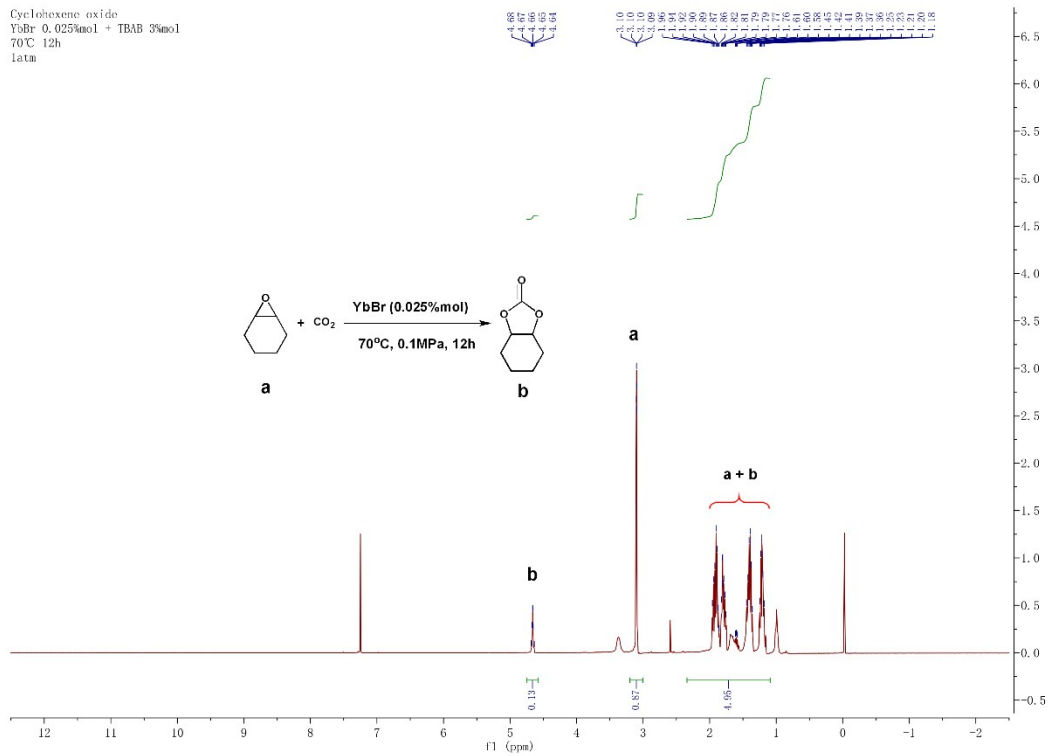

**Table S3.** Crystal Data for Compounds **1–6**.

| Compound                               | <b>1</b>                                                            | <b>2</b>                                                            | <b>3</b>                                                            | <b>4</b>                                                            | <b>5</b>                                                            | <b>6</b>                                                            |
|----------------------------------------|---------------------------------------------------------------------|---------------------------------------------------------------------|---------------------------------------------------------------------|---------------------------------------------------------------------|---------------------------------------------------------------------|---------------------------------------------------------------------|
| Formula                                | C <sub>34</sub> H <sub>24</sub> N <sub>4</sub> O <sub>9</sub> Er·Cl | C <sub>34</sub> H <sub>24</sub> N <sub>4</sub> O <sub>9</sub> Er·Br | C <sub>34</sub> H <sub>24</sub> N <sub>4</sub> O <sub>9</sub> Tm·Cl | C <sub>34</sub> H <sub>24</sub> N <sub>4</sub> O <sub>9</sub> Tm·Br | C <sub>34</sub> H <sub>24</sub> N <sub>4</sub> O <sub>9</sub> Yb·Cl | C <sub>34</sub> H <sub>24</sub> N <sub>4</sub> O <sub>9</sub> Yb·Br |
| Formula mass                           | 835.28                                                              | 879.74                                                              | 836.95                                                              | 881.41                                                              | 841.06                                                              | 885.52                                                              |
| Crystal system                         | Triclinic                                                           | Triclinic                                                           | Triclinic                                                           | Triclinic                                                           | Triclinic                                                           | Triclinic                                                           |
| Space group                            | P-1                                                                 | P-1                                                                 | P-1                                                                 | P-1                                                                 | P-1                                                                 | P-1                                                                 |
| a/Å                                    | 10.3230(5)                                                          | 10.343(7)                                                           | 10.3347(10)                                                         | 10.3230(5)                                                          | 10.2917(5)                                                          | 10.226(2)                                                           |
| b/Å                                    | 11.8090(5)                                                          | 11.870(7)                                                           | 11.8348(8)                                                          | 11.8090(5)                                                          | 11.7702(5)                                                          | 11.739(2)                                                           |
| c/Å                                    | 14.0890(7)                                                          | 13.995(9)                                                           | 14.1006(11)                                                         | 14.0890(7)                                                          | 14.0907(8)                                                          | 13.935(3)                                                           |
| α/(°)                                  | 82.680(4)                                                           | 81.813(6)                                                           | 82.848(6)                                                           | 82.680(4)                                                           | 82.913(4)                                                           | 82.307(4)                                                           |
| β/(°)                                  | 68.826(4)                                                           | 69.256(6)                                                           | 68.734(8)                                                           | 68.826(4)                                                           | 68.858(5)                                                           | 69.899(3)                                                           |
| γ/(°)                                  | 68.581(4)                                                           | 68.742(6)                                                           | 68.687(8)                                                           | 68.581(4)                                                           | 68.718(4)                                                           | 69.528(4)                                                           |
| V/Å <sup>3</sup>                       | 1490.93(12)                                                         | 1497.3(17)                                                          | 1497.2(2)                                                           | 1490.93(12)                                                         | 1483.38(12)                                                         | 1471.5(5)                                                           |
| T/K                                    | 291                                                                 | 293                                                                 | 295                                                                 | 291                                                                 | 292                                                                 | 273                                                                 |
| Z                                      | 2                                                                   | 2                                                                   | 2                                                                   | 2                                                                   | 2                                                                   | 2                                                                   |
| μ/mm <sup>-1</sup>                     | 2.97                                                                | 4.21                                                                | 3.12                                                                | 4.38                                                                | 3.31                                                                | 4.60                                                                |
| D <sub>calcd</sub> /g cm <sup>-3</sup> | 1.861                                                               | 1.951                                                               | 1.856                                                               | 1.963                                                               | 1.883                                                               | 1.999                                                               |
| F(000)                                 | 826                                                                 | 862                                                                 | 828                                                                 | 864                                                                 | 830                                                                 | 866                                                                 |
| Measured reflections                   | 11865                                                               | 11050                                                               | 12274                                                               | 12611                                                               | 10725                                                               | 9325                                                                |
| Independent reflections                | 5867                                                                | 5217                                                                | 5879                                                                | 5865                                                                | 5208                                                                | 5879                                                                |
| R <sub>1</sub> a [I > 2σ(I)]           | 0.030                                                               | 0.030                                                               | 0.029                                                               | 0.037                                                               | 0.027                                                               | 0.028                                                               |
| wR <sub>2</sub> b [I > 2σ(I)]          | 0.058                                                               | 0.062                                                               | 0.059                                                               | 0.070                                                               | 0.052                                                               | 0.065                                                               |
| GOF on F <sup>2</sup>                  | 1.05                                                                | 1.06                                                                | 1.04                                                                | 1.01                                                                | 1.04                                                                | 1.01                                                                |
| CCDC Number                            | 1051522                                                             | 1051521                                                             | 1051524                                                             | 1051523                                                             | 1051526                                                             | 1051525                                                             |

**Table S4.** The selected bond length (Å) and bond angle (deg) data for compound **1-6**.

| Compound 1                                                                              |          |                                       |             | Compound 2                                                                        |           |                                        |             |
|-----------------------------------------------------------------------------------------|----------|---------------------------------------|-------------|-----------------------------------------------------------------------------------|-----------|----------------------------------------|-------------|
| Er1—O4 <sup>i</sup>                                                                     | 2.216(3) | O4 <sup>i</sup> —Er1—O5               | 174.59(9)   | Er1—O2                                                                            | 2.292 (3) | O2—Er1—O7 <sup>i</sup>                 | 144.96 (12) |
| Er1—O5                                                                                  | 2.240(2) | O4 <sup>i</sup> —Er1—O9               | 96.54(10)   | Er1—O7 <sup>i</sup>                                                               | 2.353 (3) | O2—Er1—O8 <sup>i</sup>                 | 160.38 (12) |
| Er1—O9                                                                                  | 2.301(3) | O4 <sup>i</sup> —Er1—O8 <sup>i</sup>  | 90.56(10)   | Er1—O5                                                                            | 2.207 (3) | O2—Er1—O9                              | 74.38 (11)  |
| Er1—O8 <sup>i</sup>                                                                     | 2.298(3) | O4 <sup>i</sup> —Er1—O6 <sup>ii</sup> | 86.1(1)     | Er1—O8 <sup>i</sup>                                                               | 2.439 (3) | O2—Er1—C34 <sup>i</sup>                | 169.42 (12) |
| Er1—O6 <sup>ii</sup>                                                                    | 2.268(3) | O4 <sup>i</sup> —Er1—O1               | 93.82(10)   | Er1—O9                                                                            | 2.296 (3) | O7 <sup>i</sup> —Er1—O8 <sup>i</sup>   | 54.19 (12)  |
| Er1—O1                                                                                  | 2.448(3) | O4 <sup>i</sup> —Er1—O2               | 92.32(10)   | Er1—C34 <sup>i</sup>                                                              | 2.734 (5) | O7 <sup>i</sup> —Er1—C34 <sup>i</sup>  | 27.32 (13)  |
| Er1—O2                                                                                  | 2.369(3) | O4 <sup>i</sup> —Er1—C1               | 96.99(11)   | Er1—O3 <sup>i</sup>                                                               | 2.236 (3) | O5—Er1—O2                              | 89.68 (11)  |
|                                                                                         |          | O5—Er1—O9                             | 88.81(9)    | Er1—O4 <sup>ii</sup>                                                              | 2.267 (3) | O5—Er1—O7 <sup>i</sup>                 | 92.85 (11)  |
|                                                                                         |          | O5—Er1—O8 <sup>i</sup>                | 91.62 (10)  |                                                                                   |           | O5—Er1—O8 <sup>i</sup>                 | 93.85 (12)  |
|                                                                                         |          | O5—Er1—O6 <sup>ii</sup>               | 89.41 (9)   |                                                                                   |           | O5—Er1—O9                              | 95.13 (12)  |
|                                                                                         |          | O5—Er1—O1                             | 82.47 (10)  |                                                                                   |           | O5—Er1—C34 <sup>i</sup>                | 97.36 (12)  |
|                                                                                         |          | O5—Er1—O2                             | 88.73 (9)   |                                                                                   |           | O5—Er1—O3 <sup>i</sup>                 | 175.28 (11) |
|                                                                                         |          | O5—Er1—C1                             | 81.52 (10)  |                                                                                   |           | O5—Er1—O4 <sup>ii</sup>                | 87.15 (12)  |
|                                                                                         |          | O9—Er1—O1                             | 124.12 (10) |                                                                                   |           | O8 <sup>i</sup> —Er1—C34 <sup>i</sup>  | 27.31 (13)  |
|                                                                                         |          | O9—Er1—O2                             | 70.29 (10)  |                                                                                   |           | O9—Er1—O7 <sup>i</sup>                 | 70.58 (12)  |
|                                                                                         |          | O9—Er1—C1                             | 96.96 (12)  |                                                                                   |           | O9—Er1—O8 <sup>i</sup>                 | 124.36 (11) |
|                                                                                         |          | O8 <sup>i</sup> —Er1—O9               | 74.74 (9)   |                                                                                   |           | O9—Er1—C34 <sup>i</sup>                | 97.05 (14)  |
|                                                                                         |          | O8 <sup>i</sup> —Er1—O1               | 159.83 (10) |                                                                                   |           | O3 <sup>i</sup> —Er1—O2                | 92.65 (11)  |
|                                                                                         |          | O8 <sup>i</sup> —Er1—O2               | 145.02 (10) |                                                                                   |           | O3 <sup>i</sup> —Er1—O7 <sup>i</sup>   | 87.60 (11)  |
|                                                                                         |          | O8 <sup>i</sup> —Er1—C1               | 169.43 (10) |                                                                                   |           | O3 <sup>i</sup> —Er1—O8 <sup>i</sup>   | 82.60 (11)  |
|                                                                                         |          | O6 <sup>ii</sup> —Er1—O9              | 154.47 (10) |                                                                                   |           | O3 <sup>i</sup> —Er1—O9                | 89.45 (12)  |
|                                                                                         |          | O6 <sup>ii</sup> —Er1—O8 <sup>i</sup> | 79.86 (9)   |                                                                                   |           | O3 <sup>i</sup> —Er1—C34 <sup>i</sup>  | 80.91 (12)  |
|                                                                                         |          | O6 <sup>ii</sup> —Er1—O1              | 80.81 (10)  |                                                                                   |           | O3 <sup>i</sup> —Er1—O4 <sup>ii</sup>  | 89.17 (12)  |
|                                                                                         |          | O6 <sup>ii</sup> —Er1—O2              | 135.12 (10) |                                                                                   |           | O4 <sup>ii</sup> —Er1—O2               | 80.76 (11)  |
|                                                                                         |          | O6 <sup>ii</sup> —Er1—C1              | 107.95 (12) |                                                                                   |           | O4 <sup>ii</sup> —Er1—O7 <sup>i</sup>  | 134.26 (12) |
|                                                                                         |          | O1—Er1—C1                             | 27.18 (10)  |                                                                                   |           | O4 <sup>ii</sup> —Er1—O8 <sup>i</sup>  | 80.15 (12)  |
|                                                                                         |          | O2—Er1—O1                             | 54.5 (1)    |                                                                                   |           | O4 <sup>ii</sup> —Er1—O9               | 155.01 (11) |
|                                                                                         |          | O2—Er1—C1                             | 27.74 (11)  |                                                                                   |           | O4 <sup>ii</sup> —Er1—C34 <sup>i</sup> | 107.36 (14) |
| Symmetry codes: (i) $x-1, y+1, z+1$ ; (ii) $-x-1, -y+2, -z+2$ ; (iii) $x+1, y-1, z-1$ . |          |                                       |             | Symmetry codes: (i) $x, y+1, z-1$ ; (ii) $-x+2, -y, -z+1$ ; (iii) $x, y-1, z+1$ . |           |                                        |             |

| Compound 3                                                                   |           |                                         |             | Compound 4                                                               |           |                                       |             |
|------------------------------------------------------------------------------|-----------|-----------------------------------------|-------------|--------------------------------------------------------------------------|-----------|---------------------------------------|-------------|
| Tm1—O1                                                                       | 2.445 (3) | O1—Tm1—C1                               | 27.57 (10)  | Tm1—O4 <sup>i</sup>                                                      | 2.195 (3) | O4 <sup>i</sup> —Tm1—O2               | 92.82 (13)  |
| Tm1—O2                                                                       | 2.354 (3) | O2—Tm1—O1                               | 54.51 (9)   | Tm1—O2                                                                   | 2.360 (4) | O4 <sup>i</sup> —Tm1—C1               | 97.85 (15)  |
| Tm1—O5                                                                       | 2.286 (3) | O2—Tm1—C1                               | 27.37 (10)  | Tm1—C1                                                                   | 2.744 (6) | O4 <sup>i</sup> —Tm1—O1               | 94.48 (14)  |
| Tm1—O8 <sup>i</sup>                                                          | 2.231 (2) | O5—Tm1—O1                               | 159.50 (10) | Tm1—O1                                                                   | 2.426 (4) | O4 <sup>i</sup> —Tm1—O6 <sup>ii</sup> | 87.87 (13)  |
| Tm1—C1                                                                       | 2.734 (4) | O5—Tm1—O2                               | 145.36 (10) | Tm1—O6 <sup>ii</sup>                                                     | 2.244 (3) | O4 <sup>i</sup> —Tm1—O5               | 175.97 (13) |
| Tm1—O7 <sup>ii</sup>                                                         | 2.255 (2) | O5—Tm1—C1                               | 169.36 (10) | Tm1—O5                                                                   | 2.213 (3) | O4 <sup>i</sup> —Tm1—O9               | 94.26 (13)  |
| Tm1—O4 <sup>iii</sup>                                                        | 2.205 (2) | O5—Tm1—O9                               | 75.08 (10)  | Tm1—O9                                                                   | 2.257 (3) | O4 <sup>i</sup> —Tm1—O8 <sup>i</sup>  | 88.86 (14)  |
| Tm1—O9                                                                       | 2.289 (2) | O8 <sup>i</sup> —Tm1—O1                 | 82.48 (10)  | Tm1—O8 <sup>i</sup>                                                      | 2.293 (4) | O2—Tm1—C1                             | 26.78 (13)  |
|                                                                              |           | O8 <sup>i</sup> —Tm1—O2                 | 88.48 (9)   |                                                                          |           | O2—Tm1—O1                             | 53.63 (12)  |
|                                                                              |           | O8 <sup>i</sup> —Tm1—O5                 | 91.68 (10)  |                                                                          |           | O1—Tm1—C1                             | 27.34 (13)  |
|                                                                              |           | O8 <sup>i</sup> —Tm1—C1                 | 81.37 (10)  |                                                                          |           | O6 <sup>ii</sup> —Tm1—O2              | 134.92 (13) |
|                                                                              |           | O8 <sup>i</sup> —Tm1—O7 <sup>ii</sup>   | 89.37 (8)   |                                                                          |           | O6 <sup>ii</sup> —Tm1—C1              | 108.57 (15) |
|                                                                              |           | O8 <sup>i</sup> —Tm1—O9                 | 89.11 (9)   |                                                                          |           | O6 <sup>ii</sup> —Tm1—O1              | 81.35 (13)  |
|                                                                              |           | O7 <sup>ii</sup> —Tm1—O1                | 80.55 (10)  |                                                                          |           | O6 <sup>ii</sup> —Tm1—O9              | 155.03 (14) |
|                                                                              |           | O7 <sup>ii</sup> —Tm1—O2                | 134.89 (10) |                                                                          |           | O6 <sup>ii</sup> —Tm1—O8 <sup>i</sup> | 79.41 (13)  |
|                                                                              |           | O7 <sup>ii</sup> —Tm1—O5                | 79.75 (10)  |                                                                          |           | O5—Tm1—O2                             | 87.51 (13)  |
|                                                                              |           | O7 <sup>ii</sup> —Tm1—C1                | 108.06 (11) |                                                                          |           | O5—Tm1—C1                             | 80.66 (14)  |
|                                                                              |           | O7 <sup>ii</sup> —Tm1—O9                | 154.72 (10) |                                                                          |           | O5—Tm1—O1                             | 82.48 (13)  |
|                                                                              |           | O4 <sup>iii</sup> —Tm1—O1               | 94.06 (10)  |                                                                          |           | O5—Tm1—O6 <sup>ii</sup>               | 89.05 (12)  |
|                                                                              |           | O4 <sup>iii</sup> —Tm1—O2               | 92.57 (10)  |                                                                          |           | O5—Tm1—O9                             | 89.63 (12)  |
|                                                                              |           | O4 <sup>iii</sup> —Tm1—O5               | 90.29 (10)  |                                                                          |           | O5—Tm1—O8 <sup>i</sup>                | 93.14 (13)  |
|                                                                              |           | O4 <sup>iii</sup> —Tm1—O8 <sup>i</sup>  | 174.90 (9)  |                                                                          |           | O9—Tm1—O2                             | 69.90 (13)  |
|                                                                              |           | O4 <sup>iii</sup> —Tm1—C1               | 97.31 (11)  |                                                                          |           | O9—Tm1—C1                             | 95.80 (15)  |
|                                                                              |           | O4 <sup>iii</sup> —Tm1—O7 <sup>ii</sup> | 86.35 (9)   |                                                                          |           | O9—Tm1—O1                             | 123.14 (12) |
|                                                                              |           | O4 <sup>iii</sup> —Tm1—O9               | 95.94 (9)   |                                                                          |           | O9—Tm1—O8 <sup>i</sup>                | 75.77 (12)  |
|                                                                              |           | O9—Tm1—O1                               | 124.20 (10) |                                                                          |           | O8 <sup>i</sup> —Tm1—O2               | 145.66 (12) |
|                                                                              |           | O9—Tm1—O2                               | 70.28 (10)  |                                                                          |           | O8 <sup>i</sup> —Tm1—C1               | 169.66 (14) |
|                                                                              |           | O9—Tm1—C1                               | 96.64 (11)  |                                                                          |           | O8 <sup>i</sup> —Tm1—O1               | 160.34 (12) |
| Symmetry codes: (i) x+1, y-1, z-1; (ii) -x, -y+1, -z+2; (iii) x-1, y+1, z+1. |           |                                         |             | Symmetry codes: (i) x, y-1, z+1; (ii) -x+2, -y, -z+1; (iii) x, y+1, z-1. |           |                                       |             |

| Compound 5                                                                   |           |                                         |             | Compound 6                                                               |           |                                       |             |
|------------------------------------------------------------------------------|-----------|-----------------------------------------|-------------|--------------------------------------------------------------------------|-----------|---------------------------------------|-------------|
| Tm1—O1                                                                       | 2.445 (3) | O1—Tm1—C1                               | 27.57 (10)  | Yb1—O5                                                                   | 2.268 (3) | O5—Yb1—O4 <sup>i</sup>                | 159.84 (10) |
| Tm1—O2                                                                       | 2.354 (3) | O2—Tm1—O1                               | 54.51 (9)   | Yb1—O1                                                                   | 2.190 (3) | O5—Yb1—O3 <sup>i</sup>                | 145.06 (10) |
| Tm1—O5                                                                       | 2.286 (3) | O2—Tm1—C1                               | 27.37 (10)  | Yb1—O4 <sup>i</sup>                                                      | 2.421 (3) | O5—Yb1—C17 <sup>i</sup>               | 169.63 (12) |
| Tm1—O8 <sup>i</sup>                                                          | 2.231 (2) | O5—Tm1—O1                               | 159.50 (10) | Yb1—O3 <sup>i</sup>                                                      | 2.330 (3) | O5—Yb1—H9A                            | 58.6 (11)   |
| Tm1—C1                                                                       | 2.734 (4) | O5—Tm1—O2                               | 145.36 (10) | Yb1—C17 <sup>i</sup>                                                     | 2.710 (4) | O1—Yb1—O5                             | 90.05 (10)  |
| Tm1—O7 <sup>ii</sup>                                                         | 2.255 (2) | O5—Tm1—C1                               | 169.36 (10) | Yb1—O9                                                                   | 2.254 (3) | O1—Yb1—O4 <sup>i</sup>                | 93.46 (11)  |
| Tm1—O4 <sup>iii</sup>                                                        | 2.205 (2) | O5—Tm1—O9                               | 75.08 (10)  | Yb1—O8 <sup>i</sup>                                                      | 2.206 (3) | O1—Yb1—O3 <sup>i</sup>                | 92.28 (10)  |
| Tm1—O9                                                                       | 2.289 (2) | O8 <sup>i</sup> —Tm1—O1                 | 82.48 (10)  | Yb1—O7 <sup>ii</sup>                                                     | 2.233 (3) | O1—Yb1—C17 <sup>i</sup>               | 97.01 (11)  |
|                                                                              |           | O8 <sup>i</sup> —Tm1—O2                 | 88.48 (9)   |                                                                          |           | O1—Yb1—O9                             | 95.47 (11)  |
|                                                                              |           | O8 <sup>i</sup> —Tm1—O5                 | 91.68 (10)  |                                                                          |           | O1—Yb1—O8 <sup>i</sup>                | 175.46 (11) |
|                                                                              |           | O8 <sup>i</sup> —Tm1—C1                 | 81.37 (10)  |                                                                          |           | O1—Yb1—O7 <sup>ii</sup>               | 87.23 (10)  |
|                                                                              |           | O8 <sup>i</sup> —Tm1—O7 <sup>ii</sup>   | 89.37 (8)   |                                                                          |           | O1—Yb1—H9A                            | 89.6 (12)   |
|                                                                              |           | O8 <sup>i</sup> —Tm1—O9                 | 89.11 (9)   |                                                                          |           | O4 <sup>i</sup> —Yb1—C17 <sup>i</sup> | 27.60 (12)  |
|                                                                              |           | O7 <sup>ii</sup> —Tm1—O1                | 80.55 (10)  |                                                                          |           | O4 <sup>i</sup> —Yb1—H9A              | 141.2 (11)  |
|                                                                              |           | O7 <sup>ii</sup> —Tm1—O2                | 134.89 (10) |                                                                          |           | O3 <sup>i</sup> —Yb1—O4 <sup>i</sup>  | 54.67 (10)  |
|                                                                              |           | O7 <sup>ii</sup> —Tm1—O5                | 79.75 (10)  |                                                                          |           | O3 <sup>i</sup> —Yb1—C17 <sup>i</sup> | 27.56 (11)  |
|                                                                              |           | O7 <sup>ii</sup> —Tm1—C1                | 108.06 (11) |                                                                          |           | O3 <sup>i</sup> —Yb1—H9A              | 86.5 (11)   |
|                                                                              |           | O7 <sup>ii</sup> —Tm1—O9                | 154.72 (10) |                                                                          |           | C17 <sup>i</sup> —Yb1—H9A             | 113.6 (11)  |
|                                                                              |           | O4 <sup>iii</sup> —Tm1—O1               | 94.06 (10)  |                                                                          |           | O9—Yb1—O5                             | 74.77 (10)  |
|                                                                              |           | O4 <sup>iii</sup> —Tm1—O2               | 92.57 (10)  |                                                                          |           | O9—Yb1—O4 <sup>i</sup>                | 124.51 (10) |
|                                                                              |           | O4 <sup>iii</sup> —Tm1—O5               | 90.29 (10)  |                                                                          |           | O9—Yb1—O3 <sup>i</sup>                | 70.30 (11)  |
|                                                                              |           | O4 <sup>iii</sup> —Tm1—O8 <sup>i</sup>  | 174.90 (9)  |                                                                          |           | O9—Yb1—C17 <sup>i</sup>               | 96.91 (12)  |
|                                                                              |           | O4 <sup>iii</sup> —Tm1—C1               | 97.31 (11)  |                                                                          |           | O9—Yb1—H9A                            | 17.1 (11)   |
|                                                                              |           | O4 <sup>iii</sup> —Tm1—O7 <sup>ii</sup> | 86.35 (9)   |                                                                          |           | O8 <sup>i</sup> —Yb1—O5               | 92.31 (10)  |
|                                                                              |           | O4 <sup>iii</sup> —Tm1—O9               | 95.94 (9)   |                                                                          |           | O8 <sup>i</sup> —Yb1—O4 <sup>i</sup>  | 83.01 (10)  |
|                                                                              |           | O9—Tm1—O1                               | 124.20 (10) |                                                                          |           | O8 <sup>i</sup> —Yb1—O3 <sup>i</sup>  | 88.01 (10)  |
|                                                                              |           | O9—Tm1—O2                               | 70.28 (10)  |                                                                          |           | O8 <sup>i</sup> —Yb1—C17 <sup>i</sup> | 81.19 (11)  |
|                                                                              |           | O9—Tm1—C1                               | 96.64 (11)  |                                                                          |           | O8 <sup>i</sup> —Yb1—O9               | 88.89 (11)  |
| Symmetry codes: (i) x+1, y-1, z-1; (ii) -x, -y+1, -z+2; (iii) x-1, y+1, z+1. |           |                                         |             | Symmetry codes: (i) x, y+1, z-1; (ii) -x+1, -y, -z+2; (iii) x, y-1, z+1. |           |                                       |             |

## References

1. Q. Han, L. Wang, Z. Shi, C. Xu, Z. Dong, Z. Mou and W. Liu, *Chem Asian J*, 2017, **12**, 1364-1373.
2. Z. Zhou, C. He, J. Xiu, L. Yang and C. Duan, *J Am Chem Soc*, 2015, **137**, 15066-15069.
3. H. Xu, B. Zhai, C. S. Cao and B. Zhao, *Inorg Chem*, 2016, **55**, 9671-9676.
4. V. Guillermin, L. Weselinski, Y. Belmabkhout, A. J. Cairns, V. D'Elia, L. Wojtas, K. Adil and M. Eddaoudi, *Nature chemistry*, 2014, **6**, 673-680.
5. J. Dong, H. Xu, S. L. Hou, Z. L. Wu and B. Zhao, *Inorg Chem*, 2017, **56**, 6244-6250.
6. Z. Zhao, J. Qin, C. Zhang, Y. Wang, D. Yuan and Y. Yao, *Inorg Chem*, 2017, **56**, 4569-4576.
7. B. Xu, P. Wang, M. Lv, D. Yuan and Y. Yao, *ChemCatChem*, 2016, **8**, 2466-2471.
8. L. Liu, J. Zhang, H. Fang, L. Chen and C. Y. Su, *Chem Asian J*, 2016, **11**, 2278-2283.
9. W. Y. Gao, C. Y. Tsai, L. Wojtas, T. Thiounn, C. C. Lin and S. Ma, *Inorg Chem*, 2016, **55**, 7291-7294.
10. B. Zou, L. Hao, L.-Y. Fan, Z.-M. Gao, S.-L. Chen, H. Li and C.-W. Hu, *Journal of Catalysis*, 2015, **329**, 119-129.
